# Supplementary material
Source: MDPI journal article supplement (https://www.mdpi.com/2071-1050/13/14/8023)
Supplement: s1 [file s1]

**Table S1.** Validation of experimental and equivalent areas. ANOVA (mean values).

| INDICATOR                              | All Areas |       |       |       |       | Excluding "Extreme" Cases |       |       |       |       |
|----------------------------------------|-----------|-------|-------|-------|-------|---------------------------|-------|-------|-------|-------|
|                                        | EXP       | EQ    | TOTAL | F     | SIG   | EXP                       | EQ    | TOTAL | F     | SIG   |
| Index of municipal urban vulnerability | 0.37      | -0.19 | 0.09  | 5.637 | 0.019 | 0.10                      | -0.19 | -0.04 | 1.665 | 0.199 |
| Resident population (thousands)        | 6.93      | 6.04  | 6.49  | 1.120 | 0.292 | 6.77                      | 5.82  | 6.29  | 1131  | 0290  |

Note: The number of areas is equal to 134, which is reduced to 120 when extreme cases are excluded.  
Source: Authors' own, based on Navarro et al. [2].

**Table S2.** Absolute and relative variance in retail business (density and diversity) *Descriptive statistics.*

| DENSITY                                  |                    | 2001   | 2011    | 2011-2001 |
|------------------------------------------|--------------------|--------|---------|-----------|
| Food shops                               | Control areas      | 0.5512 | 1.0471  | 0.4959    |
|                                          | Experimental areas | 0.4402 | 0.9536  | 0.5134    |
|                                          | Total              | 0.4957 | 1.0004  | 0.5047    |
| Textile shops                            | Control areas      | 1.0828 | 2.2483  | 1.1655    |
|                                          | Experimental areas | 0.5671 | 1.2786  | 0.7115    |
|                                          | Total              | 0.825  | 1.7635  | 0.9385    |
| Pharmacies and medical products          | Control areas      | 0.1506 | 0.2261  | 0.0755    |
|                                          | Experimental areas | 0.0419 | 0.0828  | 0.0409    |
|                                          | Total              | 0.0962 | 0.1545  | 0.0583    |
| Care facilities                          | Control areas      | 0.4015 | 1.1604  | 0.7589    |
|                                          | Experimental areas | 0.2382 | 0.706   | 0.4678    |
|                                          | Total              | 0.3198 | 0.9332  | 0.6134    |
| Provision of prepared food and beverages | Control areas      | 1.6217 | 4.1082  | 2.4865    |
|                                          | Experimental areas | 1.1085 | 2.8062  | 1.6977    |
|                                          | Total              | 1.3651 | 3.4572  | 2.0921    |
| Stationers                               | Control areas      | 0.2168 | 0.4233  | 0.2065    |
|                                          | Experimental areas | 0.1104 | 0.2753  | 0.1649    |
|                                          | Total              | 0.1636 | 0.3493  | 0.1857    |
| Household goods                          | Control areas      | 0.579  | 1.0327  | 0.4537    |
|                                          | Experimental areas | 0.3055 | 0.5393  | 0.2338    |
|                                          | Total              | 0.4423 | 0.786   | 0.3437    |
| General local shops                      | Control areas      | 4.6036 | 10.2463 | 5.6427    |
|                                          | Experimental areas | 2.8118 | 6.6417  | 3.8299    |
|                                          | Total              | 3.7077 | 8.444   | 4.7363    |
